# Supplementary material
Source: PubMed Central journal article supplement (PMC3350316)

**Supplementary Table 1**

|                   | <b>segments<br/>(10 runs)</b> | <b>avg. length<br/>(cM)</b> | <b>avg. length<br/>(SNPs)</b> |
|-------------------|-------------------------------|-----------------------------|-------------------------------|
| Trio-phasing      | 4                             | 3.60                        | 1184.5                        |
| Singleton-phasing | 5                             | 3.69                        | 1238.4                        |

**Supplementary Table 2**

|            | <b>AJ</b> | <b>CEU</b> | <b>CHB</b> |
|------------|-----------|------------|------------|
| <b>CEU</b> | 0.02      |            |            |
| <b>CHB</b> | 0.12      | 0.11       |            |
| <b>YRI</b> | 0.15      | 0.16       | 0.18       |

**Supplementary Table 3**

|               | <i>No. shared segments (per pair)</i> |               |               | <i>Segment length (cM per segment)</i> |               |               | <i>Genomewide sharing (cM per pair)</i> |               |               |
|---------------|---------------------------------------|---------------|---------------|----------------------------------------|---------------|---------------|-----------------------------------------|---------------|---------------|
|               | <b>HUG-AJ</b>                         | <b>IDB-AJ</b> | <b>IDB-EU</b> | <b>HUG-AJ</b>                          | <b>IDB-AJ</b> | <b>IDB-EU</b> | <b>HUG-AJ</b>                           | <b>IDB-AJ</b> | <b>IDB-EU</b> |
| <b>HUG-AJ</b> | 11.961                                |               |               | 5.51                                   |               |               | 65.90                                   |               |               |
| <b>IDB-AJ</b> | 10.203                                | 9.835         |               | 5.51                                   | 5.52          |               | 56.19                                   | 54.25         |               |
| <b>IDB-EU</b> | 0.369                                 | 0.381         | 0.440         | 4.46                                   | 4.42          | 4.11          | 1.64                                    | 1.68          | 1.81          |

**Supplementary Table 4**

|     | <b>Population</b> | <b>avg<sup>1</sup></b> | <b>Std.dev<sup>2</sup></b> |
|-----|-------------------|------------------------|----------------------------|
| HUG | AJ                | 0.671                  | 0.055                      |
| IDB | AJ                | 0.669                  | 0.069                      |
|     | EU                | 0.415                  | 0.135                      |
| HM3 | ASW               | 0.833                  | 0.704                      |
|     | CEU               | 0.364                  | 0.233                      |
|     | CHB               | 0.247                  | 0.071                      |
|     | CHD               | 0.268                  | 0.049                      |
|     | GIH               | 0.456                  | 0.065                      |
|     | JPT               | 0.257                  | 0.084                      |
|     | LWK               | 0.502                  | 0.111                      |
|     | MEX               | 0.411                  | 0.179                      |
|     | MKK               | 0.650                  | 0.104                      |
|     | TSI               | 0.478                  | 0.153                      |
|     | YRI               | 0.492                  | 0.238                      |

---

<sup>1</sup> Geometric average of decay factors per centiMorgan over the range between 3cM and the genetic length at which sharing is more rare than 1 in a thousand pairs of individuals (varies by population)

<sup>2</sup> Exponentiation of the log of the decay factors

**Supplementary Table 5**

| <b>chr</b> | <b>region</b> | <b>Peak</b> | <b>region</b> | <b>region</b> | <b>pairs<sup>1</sup></b> | <b>Structural Variation</b> |     |
|------------|---------------|-------------|---------------|---------------|--------------------------|-----------------------------|-----|
| 1          | q42.3-q43     | 235,000,000 | 234,000,000   | 235,000,000   | 472                      | 35528                       | CNV |
| 2          | q32.3-q33.1   | 196,000,000 | 193,000,000   | 199,000,000   | 805                      | 221355                      | CNV |
| 4          | p15.1-p14     | 33,000,000  | 31,000,000    | 36,000,000    | 2,817                    | 319772                      | CNV |
| 8          | p23.1-p22     | 12,000,000  | 11,000,000    | 13,000,000    | 1,296                    | 5081341                     | INV |
| 16         | p13.11-p12.3  | 16,000,000  | 16,000,000    | 17,000,000    | 525                      | 1863800                     | CNV |
| 17         | q22-q23.2     | 55,000,000  | 53,000,000    | 57,000,000    | 586                      | 703400                      | CNV |

<sup>1</sup> Population mean = 111.2; stdev = 170.7

Supplementary Figure 1

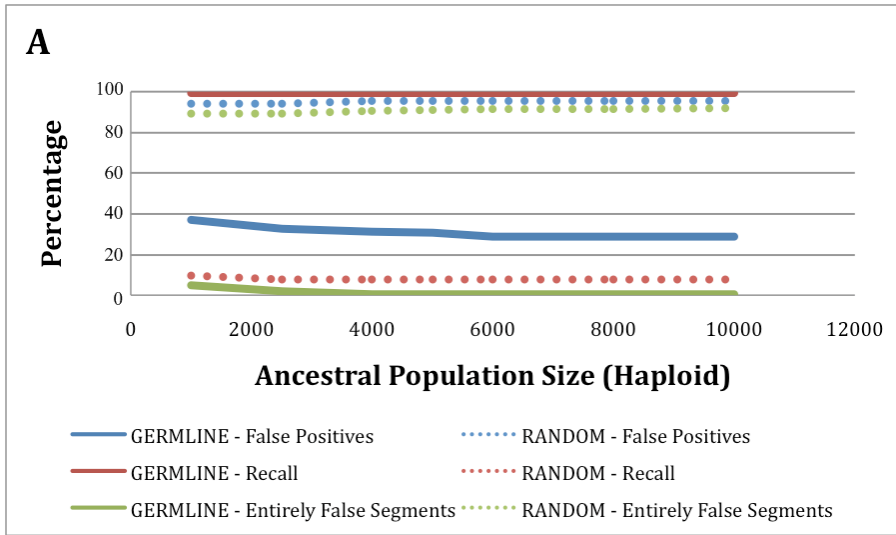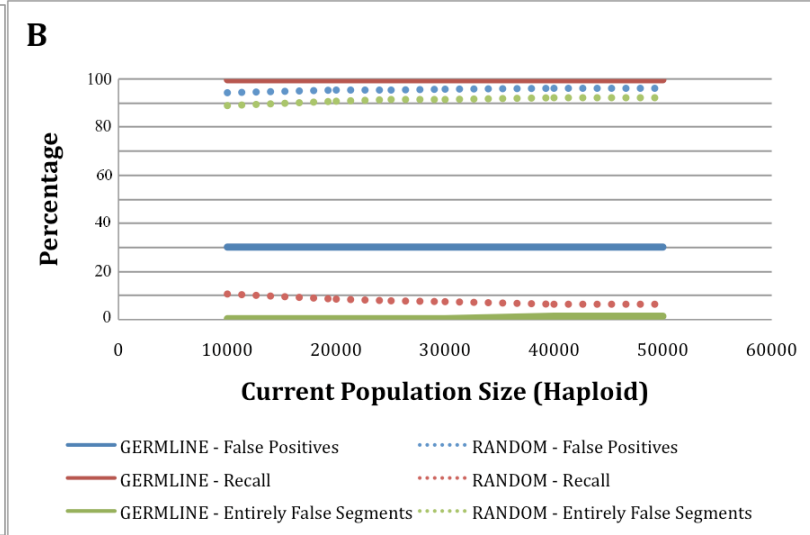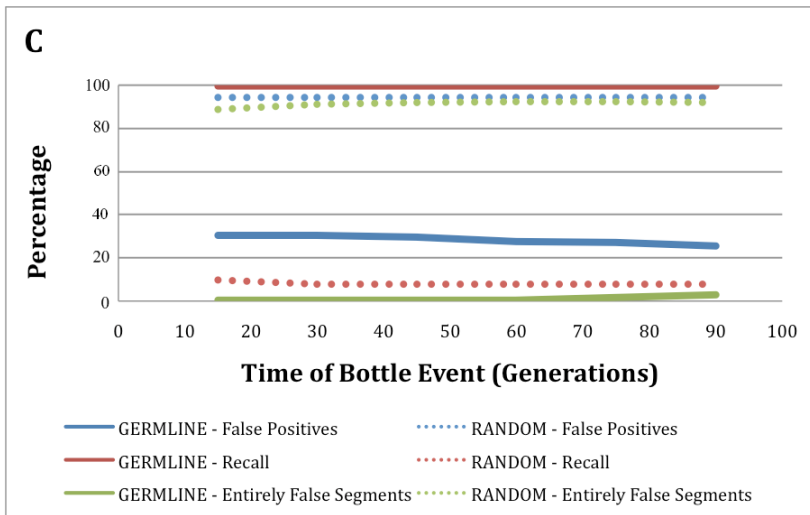

Supplementary Figure 2

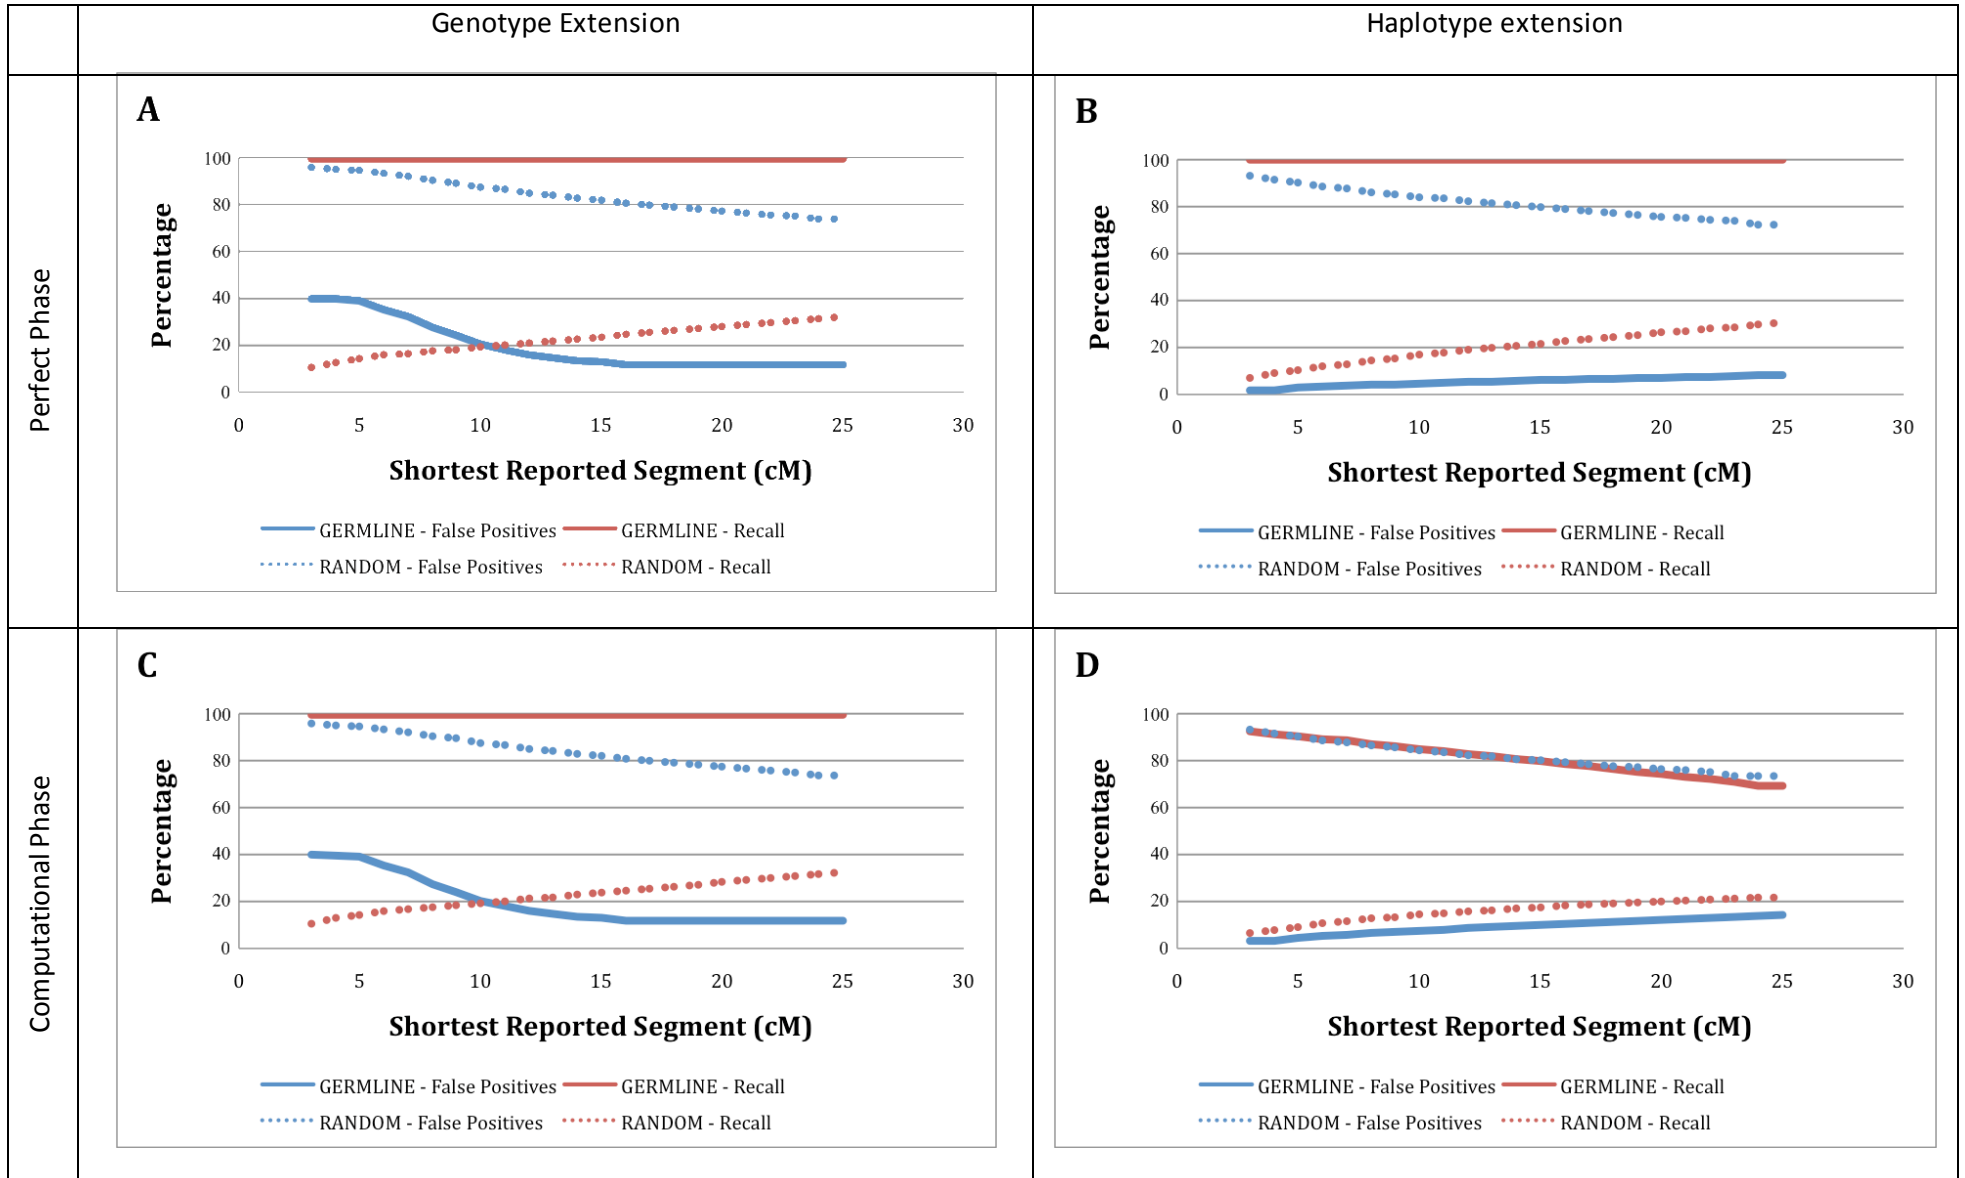

Supplementary Figure 3

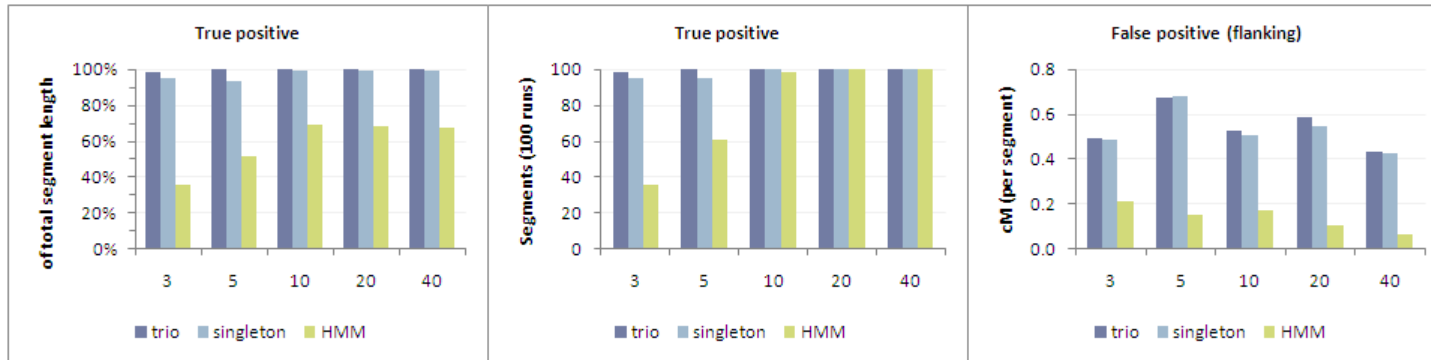



Supplementary Figure 4

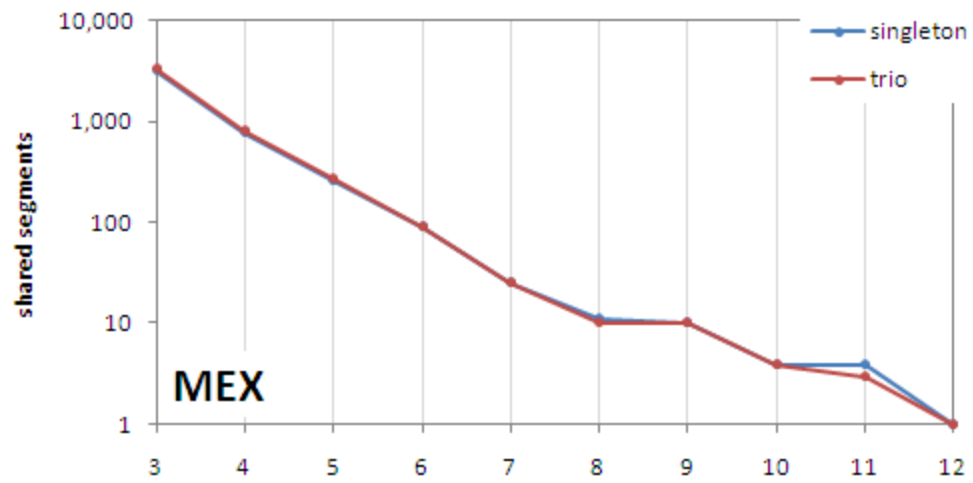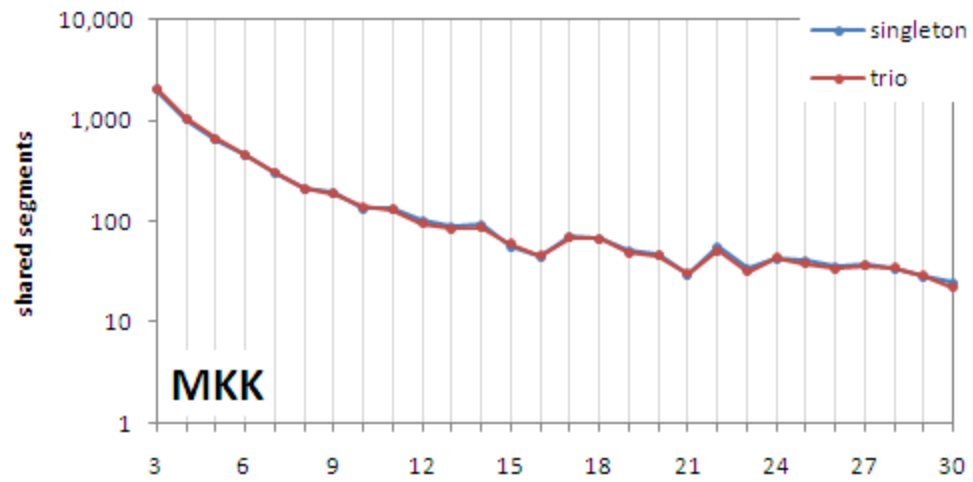

Supplementary Figure 5

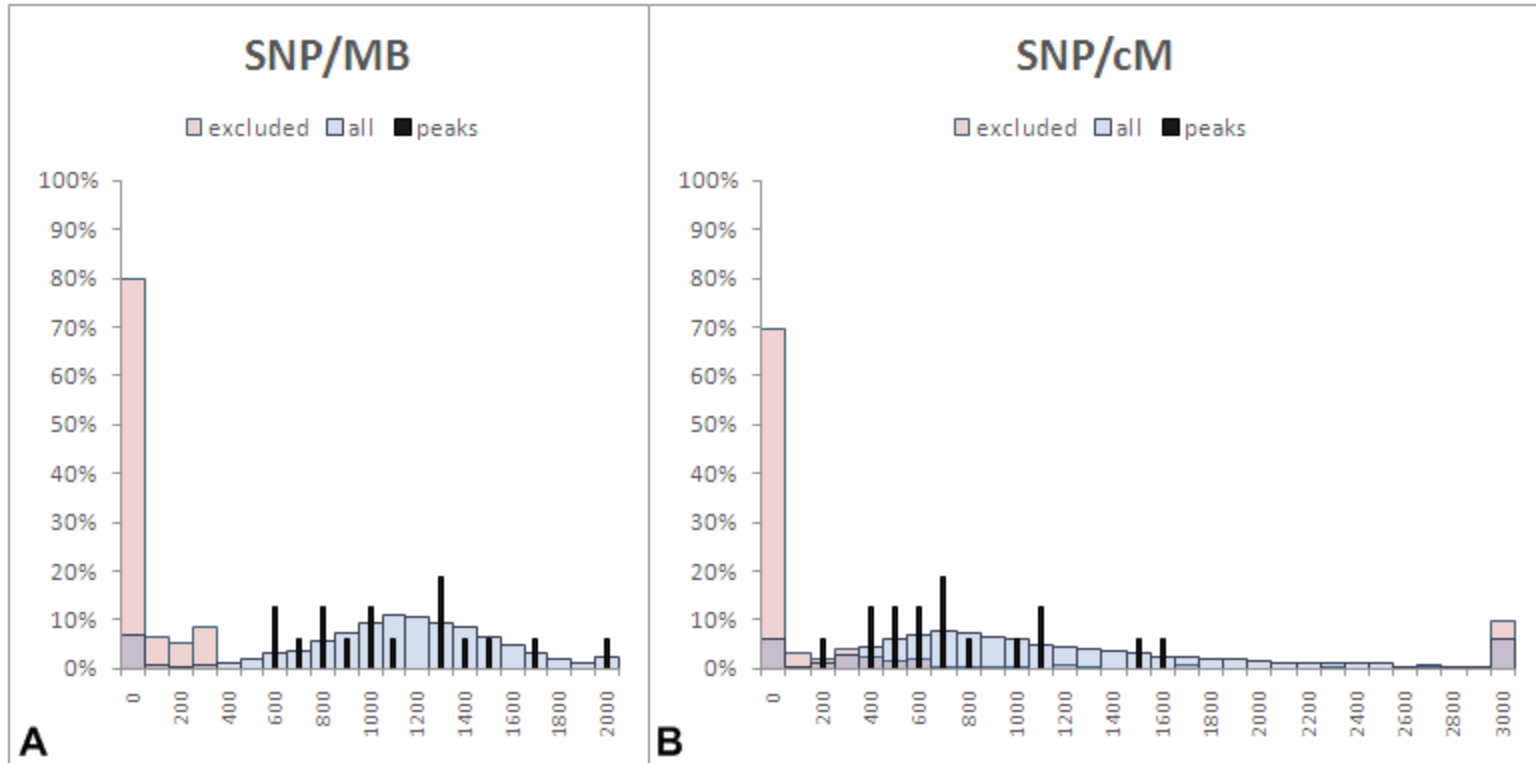



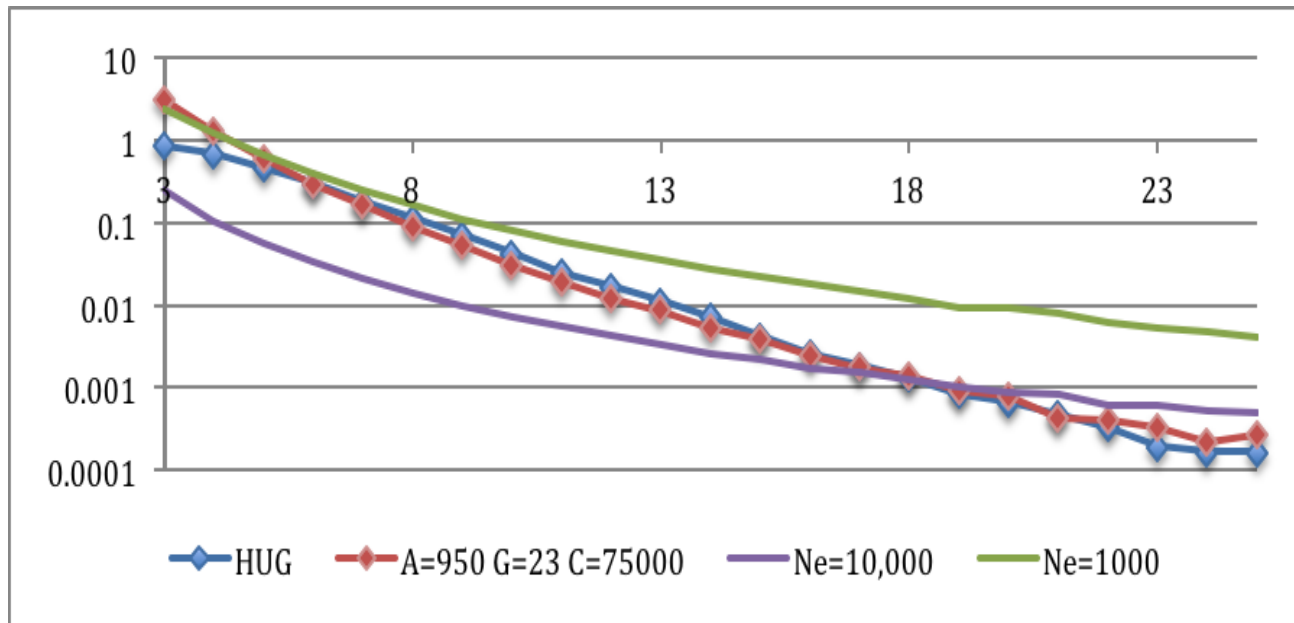

Supplementary Figure 7

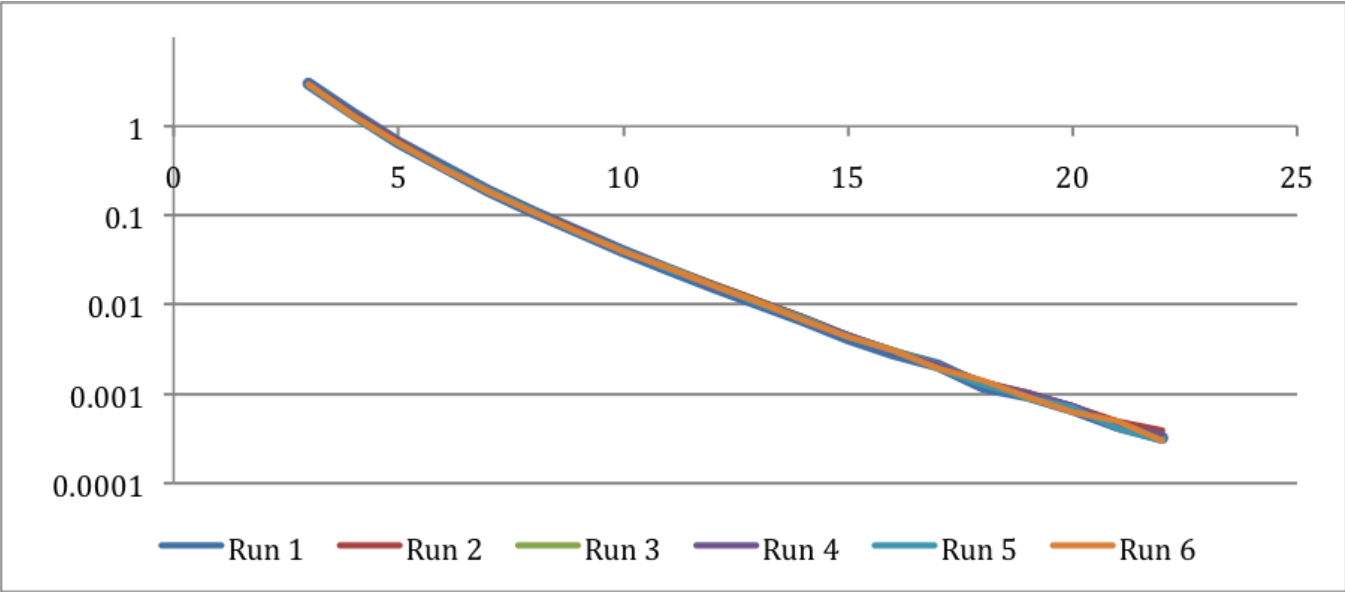

Supplementary Figure 8

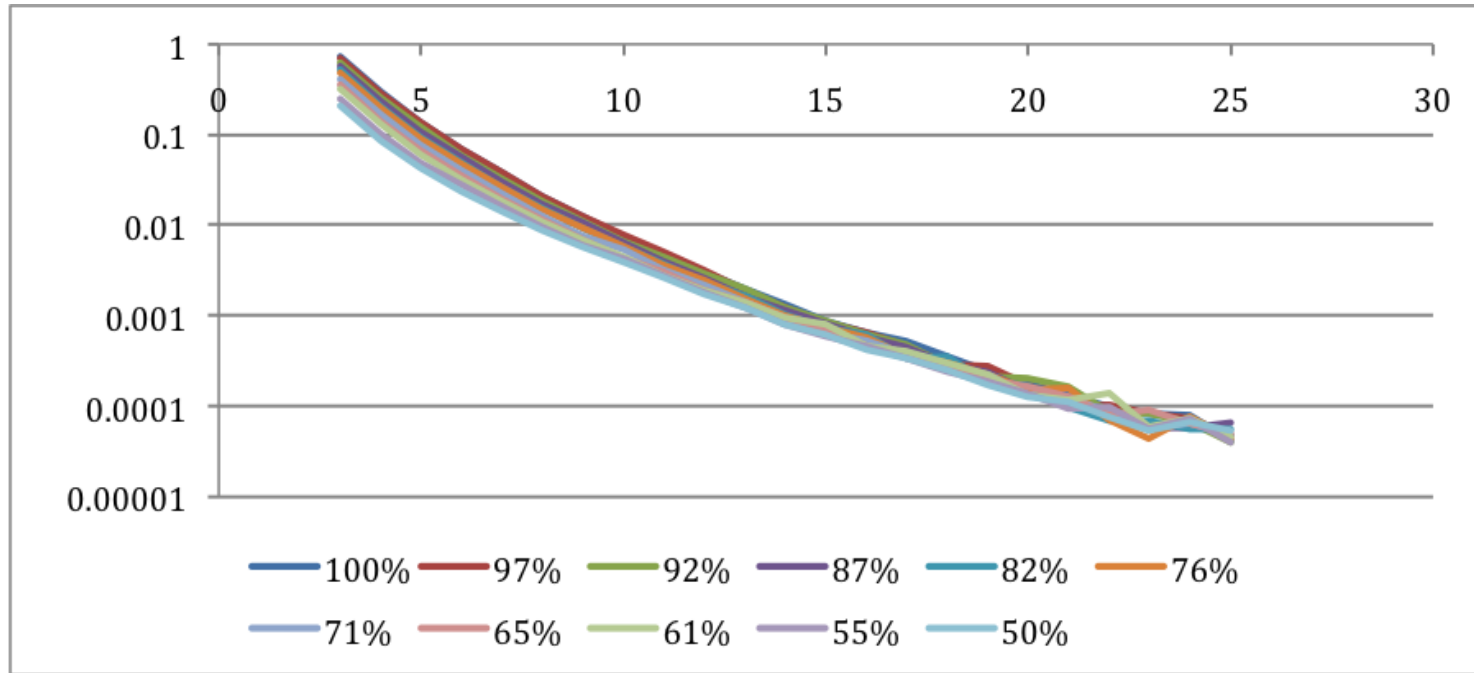

Supplementary Figure 9

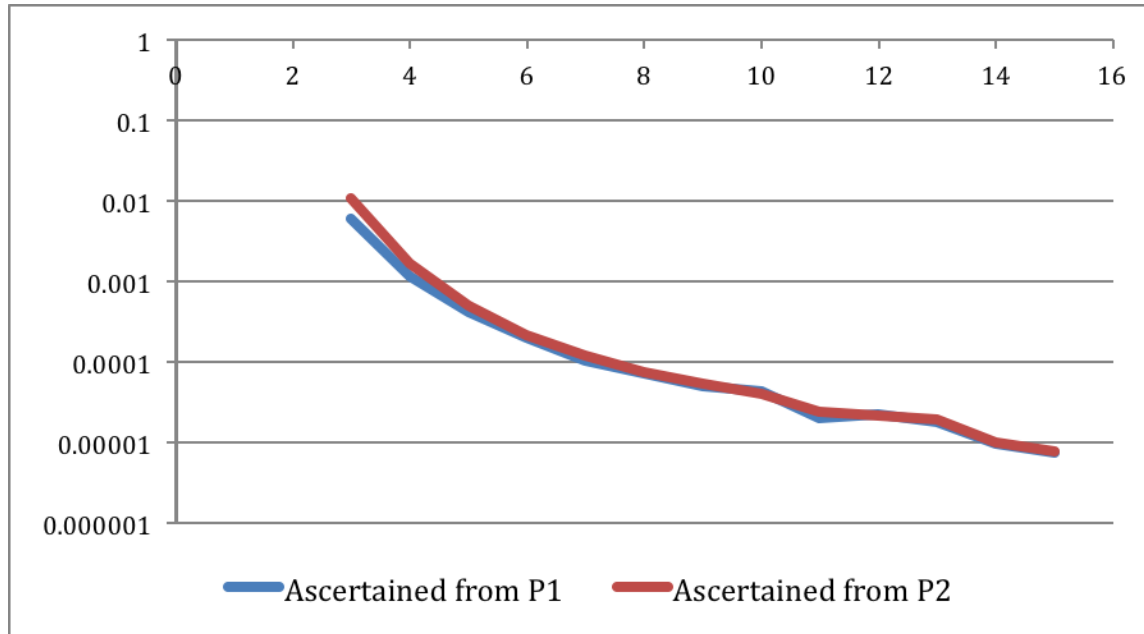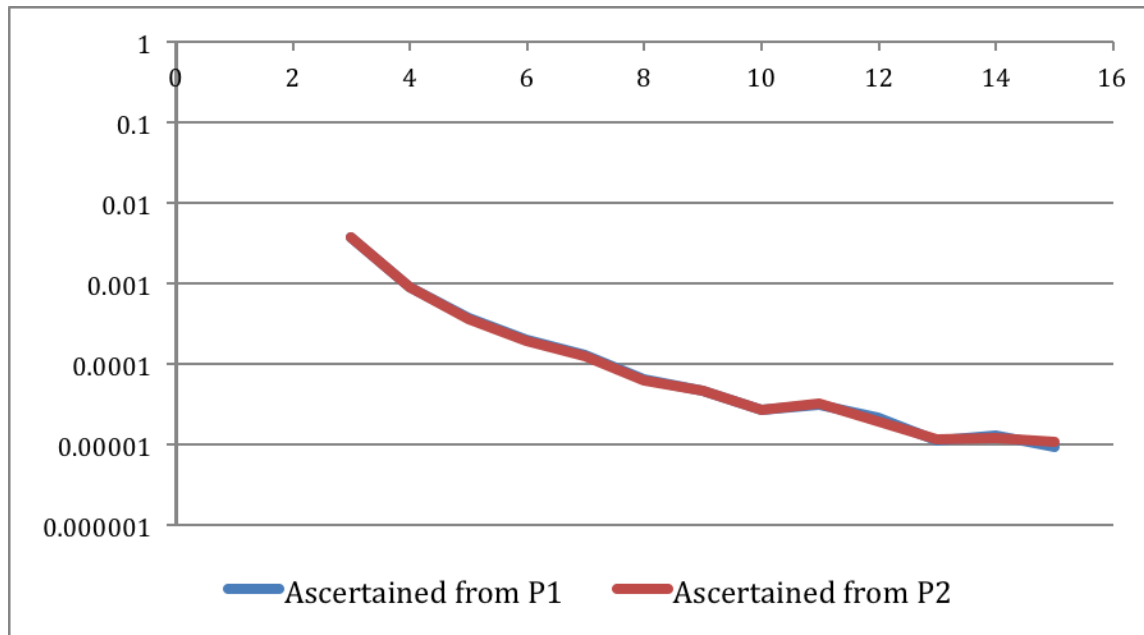





Supplementary Figure 10

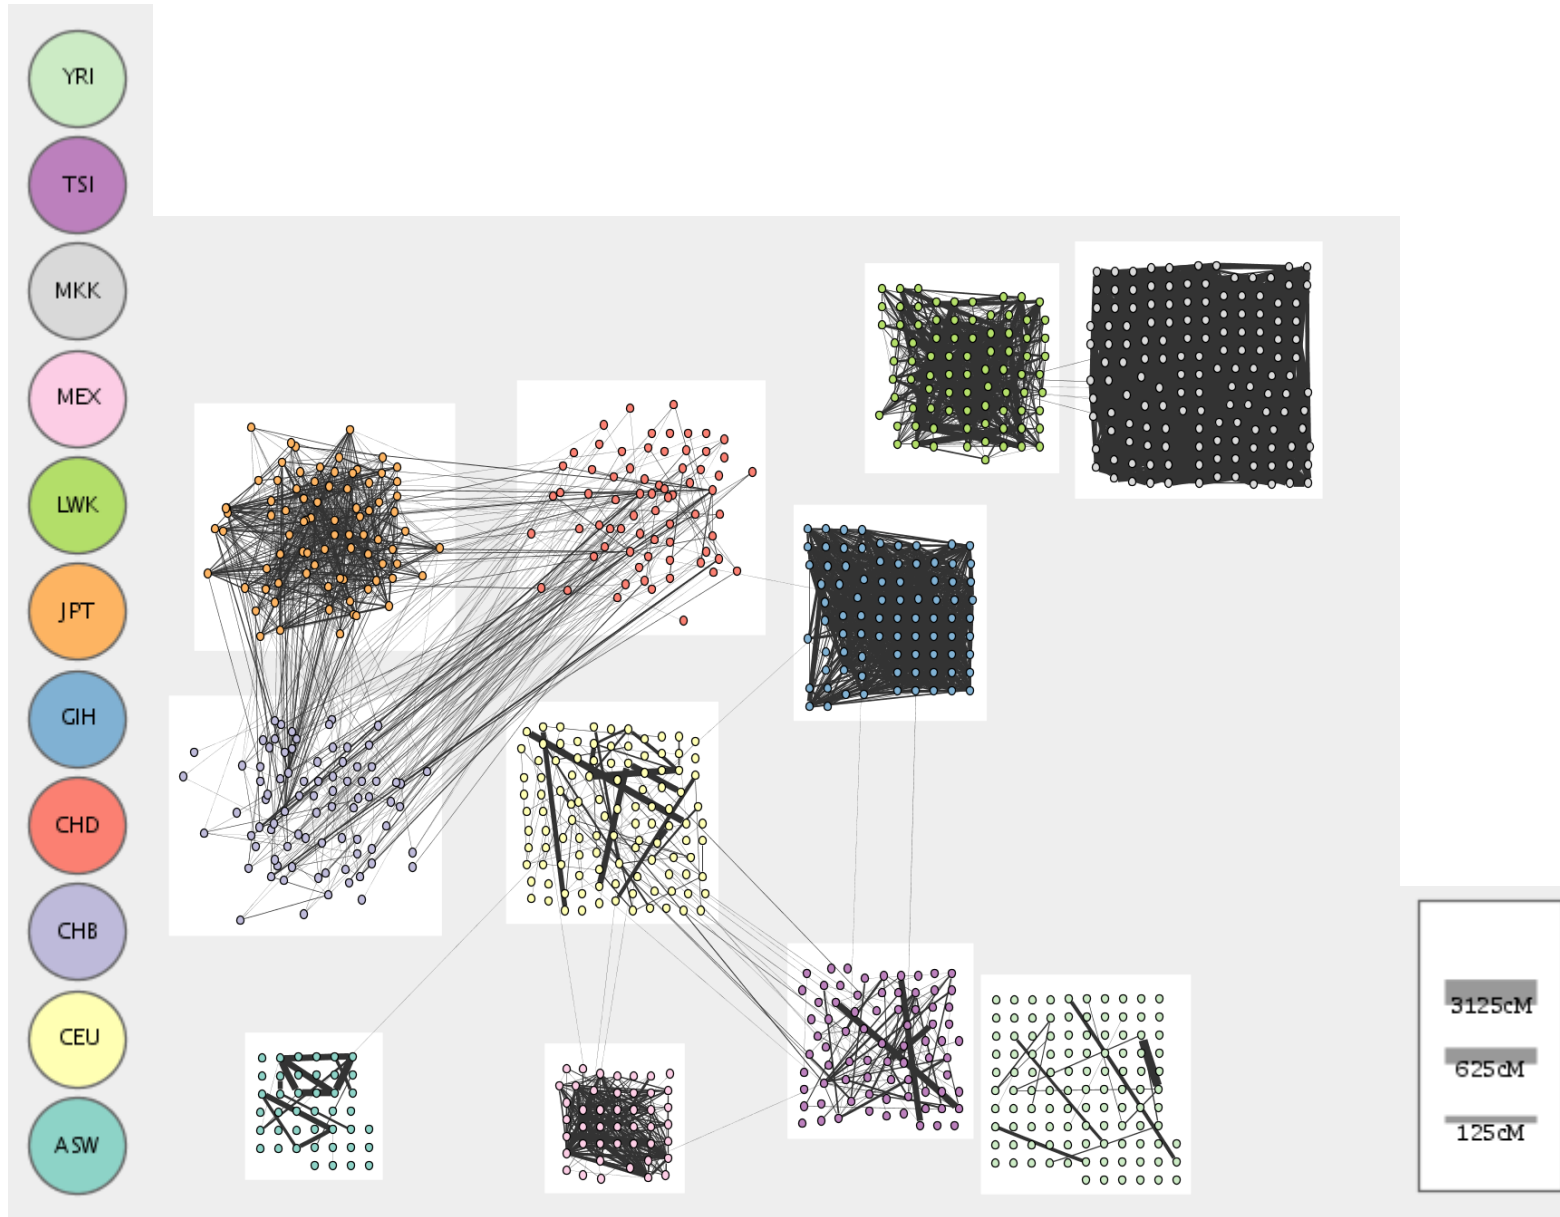

Supplementary Figure 11

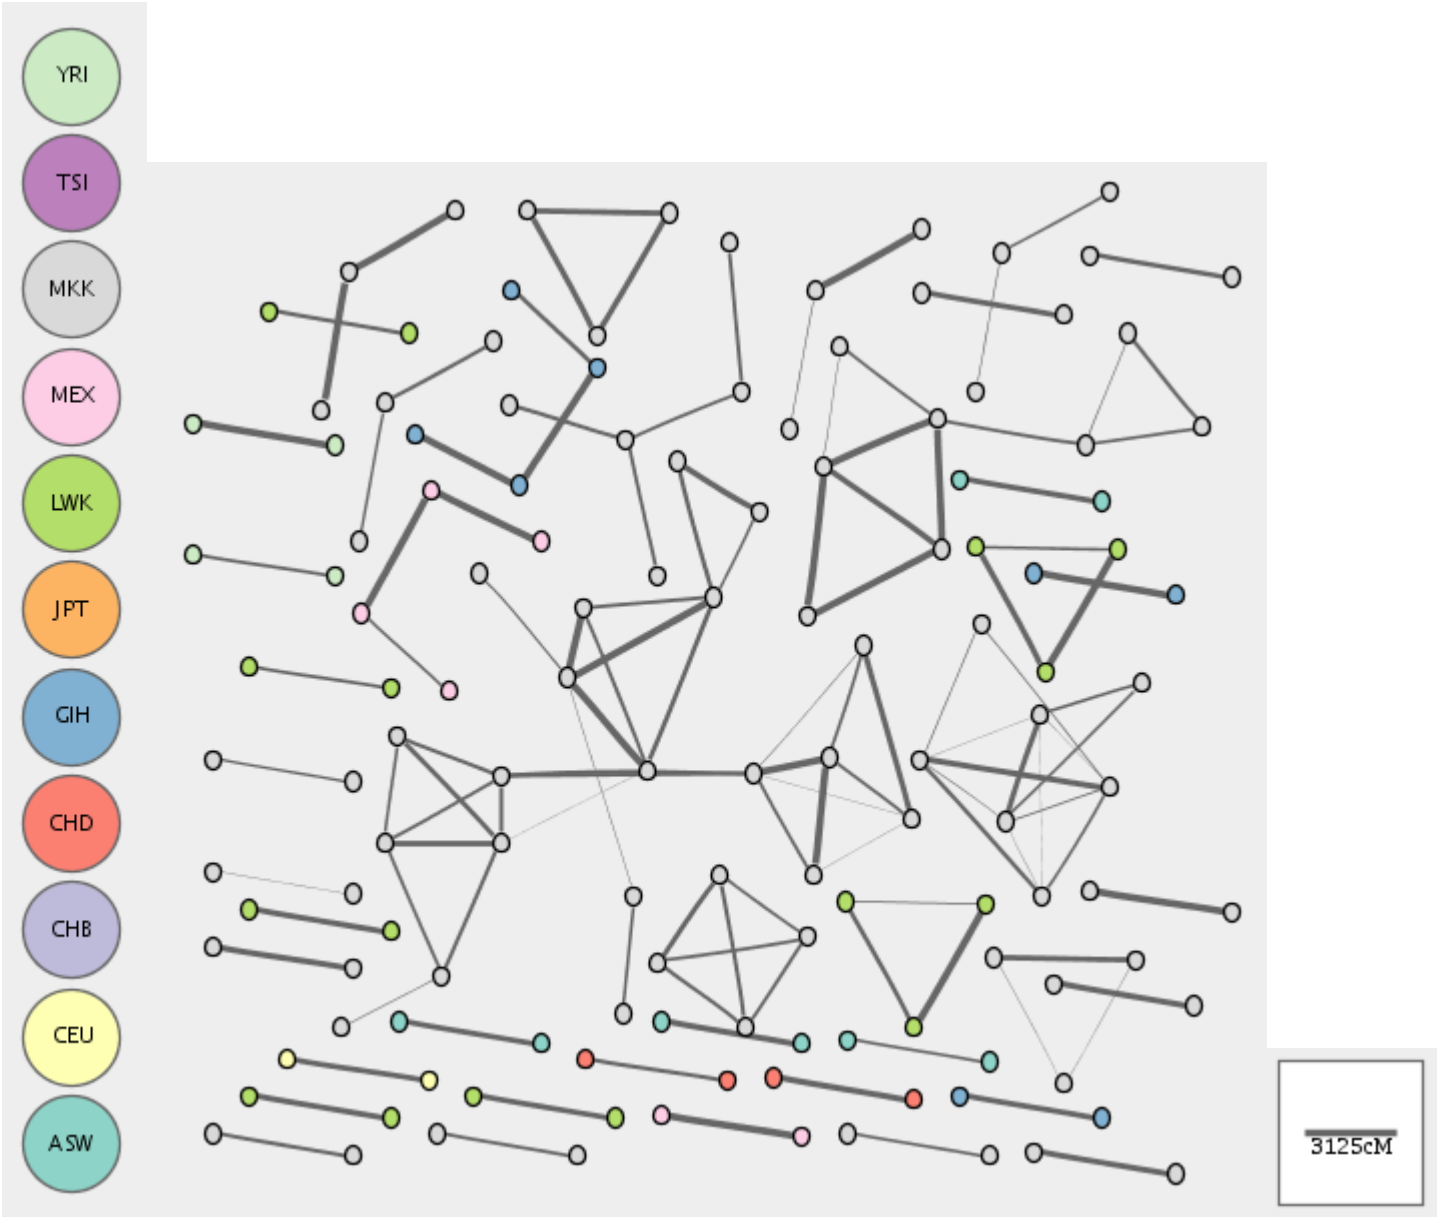

**Supplementary Figure 12**

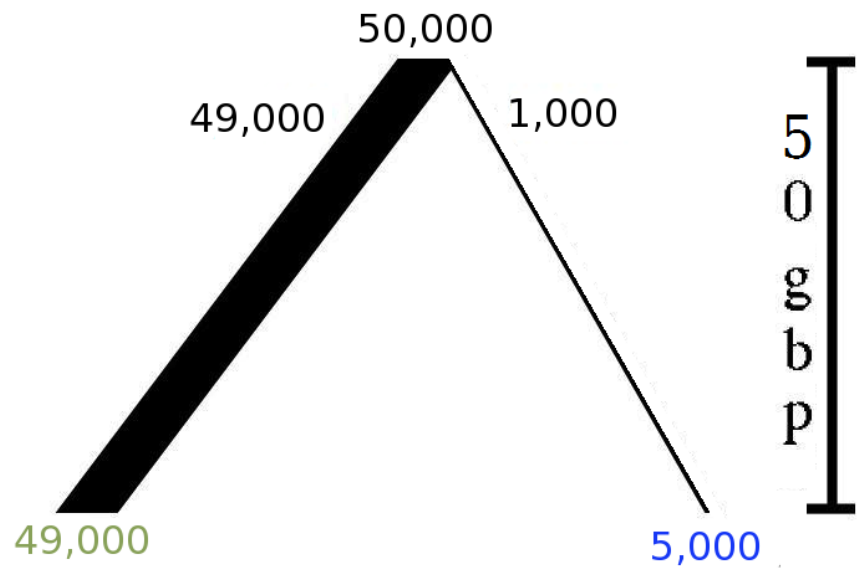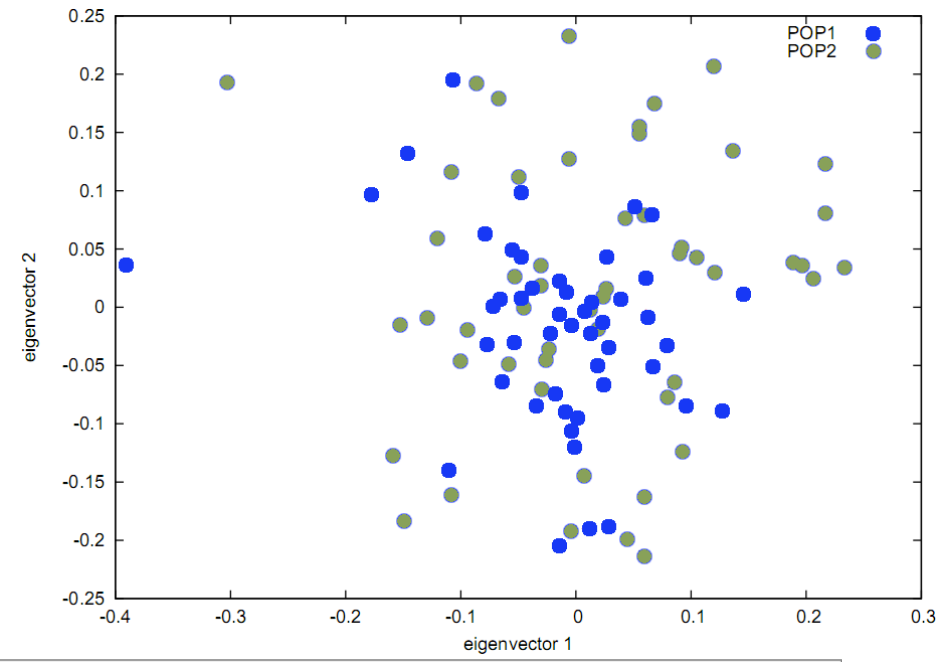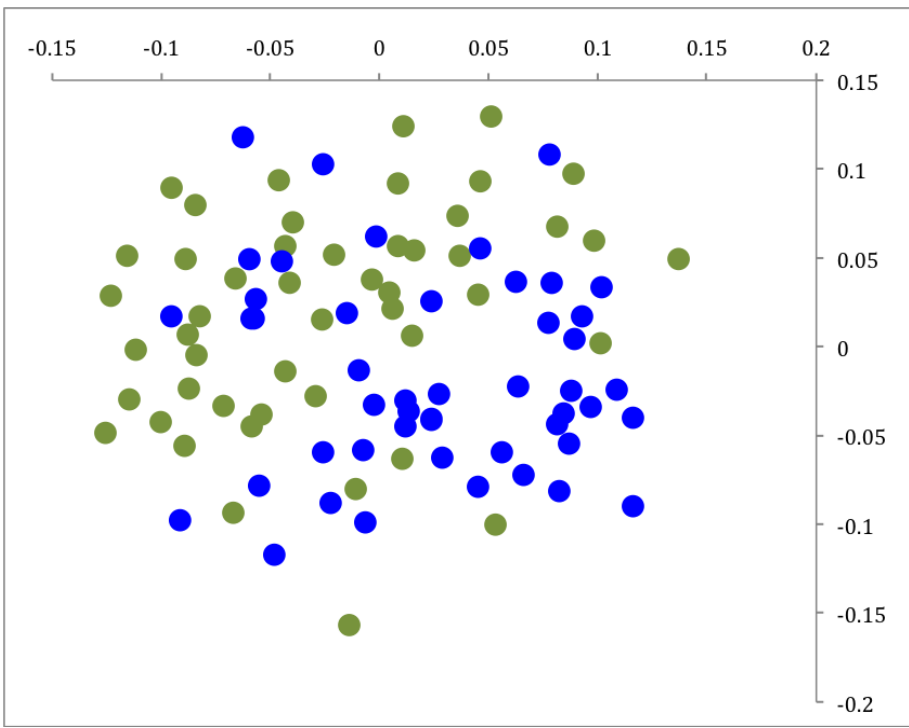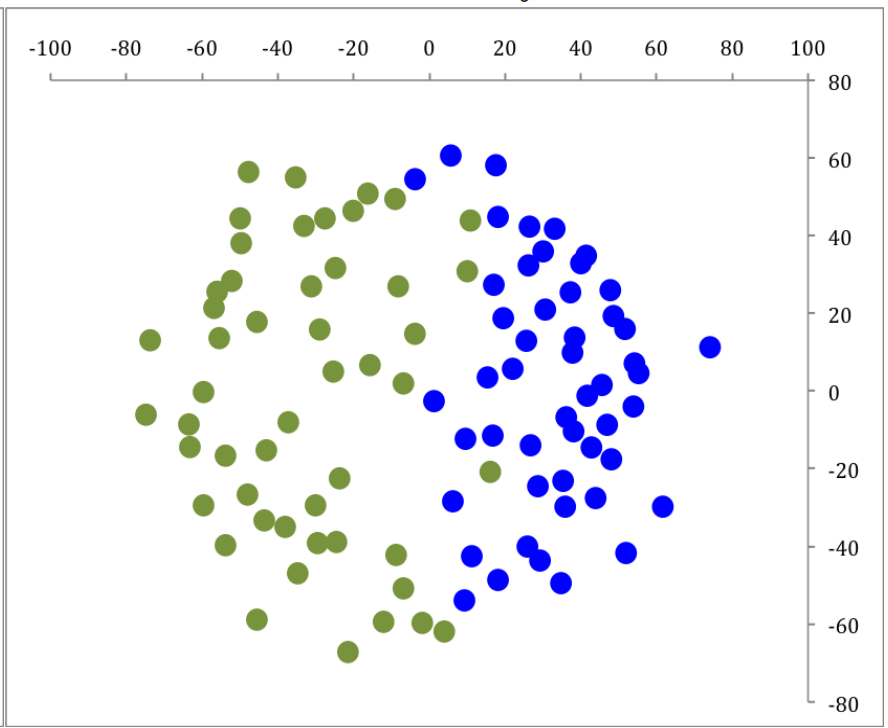

Supplementary Figure 13

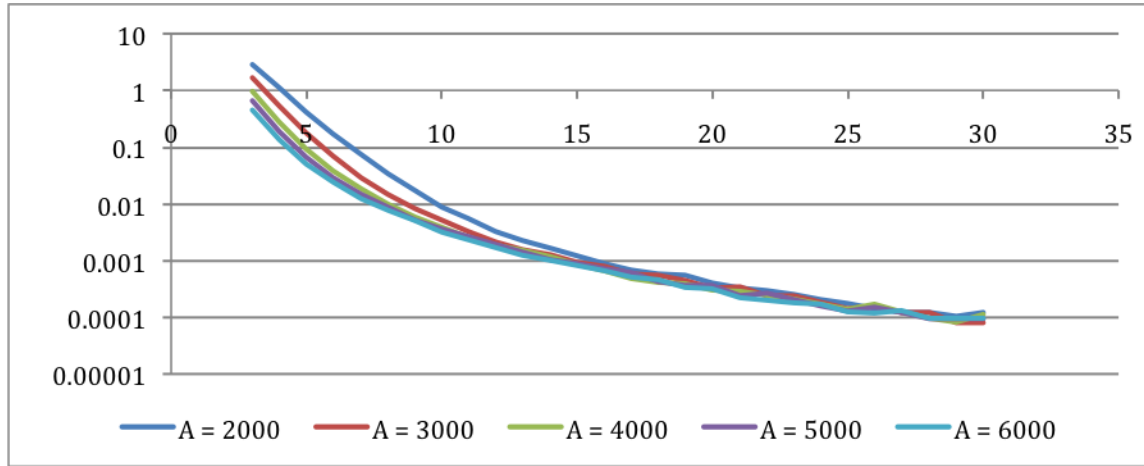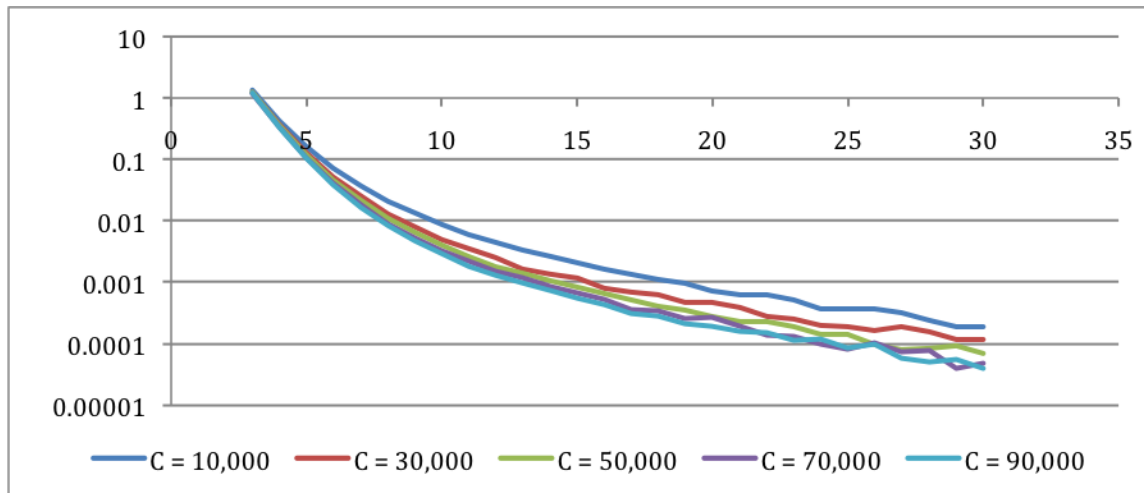

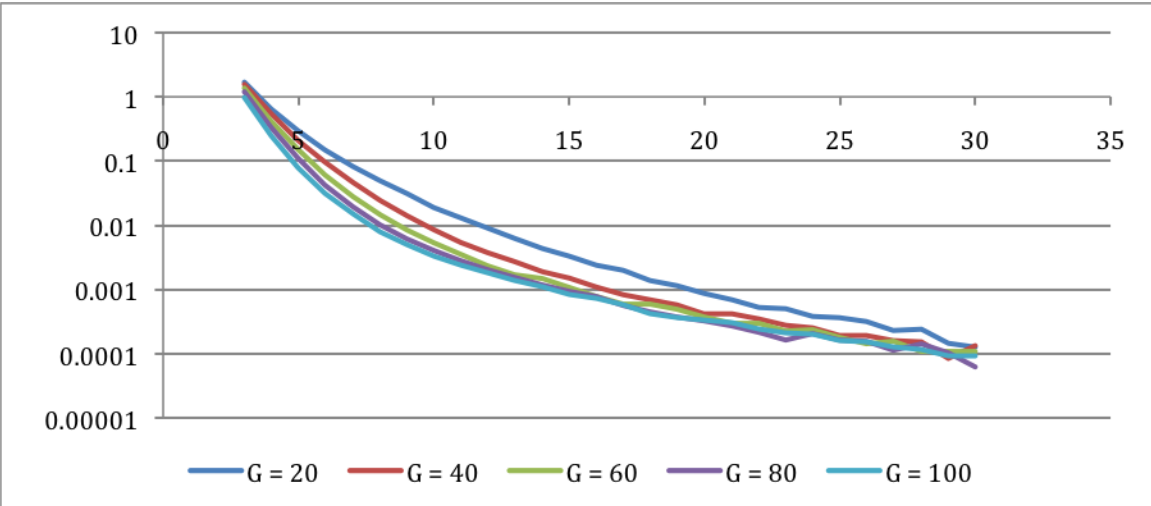

Supplementary Figure 14

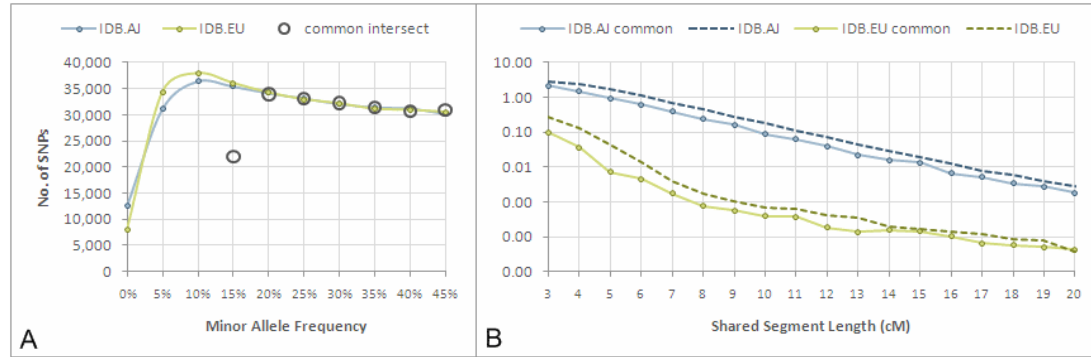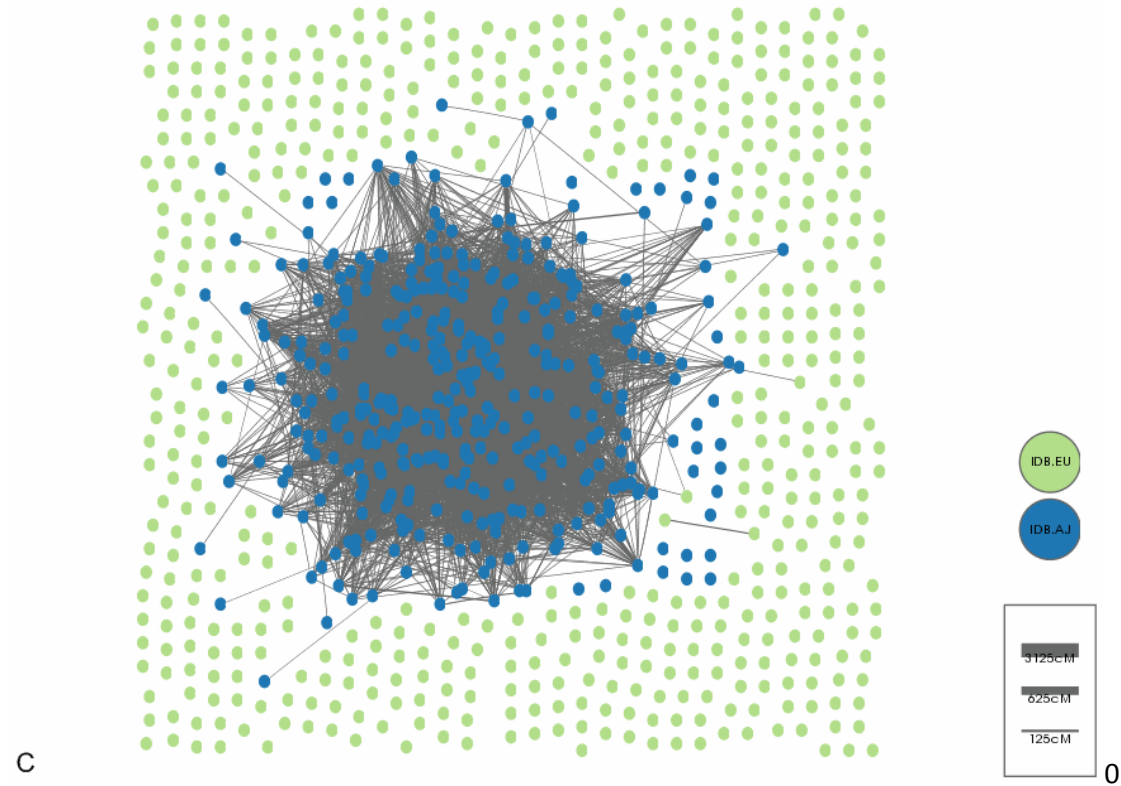

Supplement: supp_msr133_Gusev10_0821_R1_supp_tbl_fig.pdf [file supp_msr133_Gusev10_0821_R1_supp_tbl_fig.pdf]
